# Supplementary material for: Multiple functions of cerebello-thalamic neurons in learning and offline consolidation of a motor skill in mice
Source: eLife. 2026 Apr 22;13:RP102813. doi: 10.7554/eLife.102813 (PMC13102391; doi:10.7554/eLife.102813)
Supplement: Supplementary file 1. [file elife-102813-supp1.xlsx]

## Sheet: Sheet1
Site	Group 1	Group 2	n1	n2	Test	Alternative	Statistic	p-value	Adj. p-value	Sig	Effect Size
DCN	DREADD+CNO	DREADD+Saline	75	77	Wilcoxon	two.sided	2119	0.005	0.019	*	0.229716
	DREADD+CNO	Sham+CNO	75	69			1518	1.91e-05	0.000115	***	0.356411
	DREADD+CNO	Sham+Saline	75	39			899	0.000772	0.004	**	0.315225
	DREADD+Saline	Sham+CNO	77	69			2429	0.374	1		0.0738018
	DREADD+Saline	Sham+Saline	77	39			1438	0.713	1		0.034456
	Sham+CNO	Sham+Saline	69	39			1493	0.347	1		0.0907822
