# Supplementary material for: Multiple functions of cerebello-thalamic neurons in learning and offline consolidation of a motor skill in mice
Source: eLife. 2026 Apr 22;13:RP102813. doi: 10.7554/eLife.102813 (PMC13102391; doi:10.7554/eLife.102813)
Supplement: Supplementary file 2. [file elife-102813-supp2.xlsx]

## Sheet: Sheet1
Site	Group	Factor	ANOVA	p-value	Sig.	Test	Group 1	Group 2	Statistic	CI 2.5%	CI 97.5%	p-value	Cohen’s D	Sig.
DCN	DREADD	Treatment	F(1,106)=7.96	0.006	**
		Speed	F(1,106)=201.619	<0.001	***
		Treatment:Speed	F(1,106)=1.039	0.31	n.s.	post-hoc	5 rpm-SAL	5 rpm-CNO	-0.449	-12.68	8.247	0.659	-0.181	n.s.
						t-test	10 rpm-SAL	10 rpm-CNO	-1.369	-35.511	7.911	0.193	-0.542	n.s.
							15 rpm-SAL	15 rpm-CNO	-1.413	-84.228	16.328	0.174	-0.582	n.s.
							20 pm-SAL	20 rpm-CNO	-1.76	-106.225	9.759	0.097	-0.775	n.s.
							25 rpm-SAL	25 rpm-CNO	-1.776	-30.557	3.457	0.106	-0.828	n.s.
	Sham	Treatment	F(1,76)=1.836	0.179	n.s.
		Speed	F(1,76)=152.296	<0.001	***
		Treatment:Speed	F(1,76)=0.109	0.742	n.s.
