# Supplementary material for: Multiple functions of cerebello-thalamic neurons in learning and offline consolidation of a motor skill in mice
Source: eLife. 2026 Apr 22;13:RP102813. doi: 10.7554/eLife.102813 (PMC13102391; doi:10.7554/eLife.102813)
Supplement: Supplementary file 3. [file elife-102813-supp3.xlsx]

## Sheet: Sheet1
Site	Time of treatment	Day	Factor	ANOVA	p-value	Sig.
DCN	During task	1	Treatment	F(3,45)=0.9452	0.426	n.s.
		2		F(3,45)=4.021	0.013	*
		3		F(3,45)=4.212	0.01	*
		4		F(3,45)=6.601	<0.001	***
		5		F(3,45)=7.899	<0.001	***
		6		F(3,45)=13.33	<0.001	***
		7		F(3,45)=7.741	<0.001	***
	After task	1		F(3,30)=0.414	0.744	n.s.
		2		F(3,30)=6.215	0.002	**
		3		F(3,30)=3.868	0.019	*
		4		F(3,30)=2.26	0.101	n.s.
		5		F(3,30)=1.413	0.258	n.s.
		6		F(3,30)=0.256	0.856	n.s.
		7		F(3,30)=1.971	0.1396	n.s.
