# Supplementary material for: Multiple functions of cerebello-thalamic neurons in learning and offline consolidation of a motor skill in mice
Source: eLife. 2026 Apr 22;13:RP102813. doi: 10.7554/eLife.102813 (PMC13102391; doi:10.7554/eLife.102813)
Supplement: Supplementary file 4. [file elife-102813-supp4.xlsx]

## Sheet: Sheet1
Site	Time of treatment	Comparaison	Moment 1	Moment 2	Test	DREADD + CNO	DREADD + SAL	Sham + CNO	Sham + SAL
DCN	During task	overnight	Trial 7 Day 1	Trial 1 Day2	posthoc on	0.031 *	1	1	0.9
			Trial 7 Day 2	Trial 1 Day3	estimated	0.223	0.58	0.15	0.94
			Trial 7 Day 3	Trial 1 Day4	means	0.037 *	1	0.29	1
			Trial 7 Day 4	Trial 1 Day5		0.071	1	0.39	0.27
			Trial 7 Day 5	Trial 1 Day6		0.223	0.26	1	1
			Trial 7 Day 6	Trial 1 Day7		0.223	1	1	1
	After task	overnight	Trial 7 Day 1	Trial 1 Day2		<0.001 ***	1	0.933	1
			Trial 7 Day 2	Trial 1 Day3		<0.001 ***	1	0.043 *	1
			Trial 7 Day 3	Trial 1 Day4		0.305	1	0.596	1
			Trial 7 Day 4	Trial 1 Day5		-0.076	1	0.362	1
			Trial 7 Day 5	Trial 1 Day6		0.463	1	0.247	1
			Trial 7 Day 6	Trial 1 Day7		0.405	0.26	0.633	1
