# Supplementary material for: Multiple functions of cerebello-thalamic neurons in learning and offline consolidation of a motor skill in mice
Source: eLife. 2026 Apr 22;13:RP102813. doi: 10.7554/eLife.102813 (PMC13102391; doi:10.7554/eLife.102813)
Supplement: Supplementary file 5. [file elife-102813-supp5.xlsx]

## Sheet: Sheet1
Site	Estimate	Comparison	n	Estimate	Test	Alternative	Statistic	p-value	Sig.	CI 2.5%	CI 97.5%	Effect Size
DCN pooled Ctrl.	Consolidated learning	day 2 - day 1	61	45.8036	Wilcoxon	two.sided	1833	1.88e-10	***	35.3393	55.5536	0.816201
		day 3 - day 2	61	22.1606			1603	2.37e-06	***	14.6785	29.0357	0.604679
		day 4 - day 3	61	13.4465			1219	0.0499	*	0.0713885	26.1072	0.251528
		day 5 - day 4	61	7.0715			1148	0.147	n.s.	-2.76793	17.6607	0.186232
		day 6 - day 5	61	4.14357			1011	0.482	n.s.	-7.28577	16.125	0.0910469
		day 7 - day 6	61	4.49997			1063	0.401	n.s.	-6.83926	14.8036	0.10806
