# Supplementary material for: Multiple functions of cerebello-thalamic neurons in learning and offline consolidation of a motor skill in mice
Source: eLife. 2026 Apr 22;13:RP102813. doi: 10.7554/eLife.102813 (PMC13102391; doi:10.7554/eLife.102813)
Supplement: Supplementary file 7. [file elife-102813-supp7.xlsx]

## Sheet: Sheet1
Site	Group	Day	Factor	ANOVA	p-value	Sig.	Group 1	Group 2	Statistic	CI 2.5%	CI 97.5%	p-value	Cohen’s D	Sig.
DCN	DREADD	day 1	Treatment	F(1,30)=2.102	0.157	n.s.
			Treatment:Moment	F(1,30)=0.87	0.358	n.s.
		day 4	Treatment	F(1,30)=0.493	0.488	n.s.
			Treatment:Moment	F(1,30)=0.595	0.446	n.s.			posthoc
		day 7	Treatment	F(1,30)=0.131	0.72	n.s.			ttest
			Treatment:Moment	F(1,30)=8.61	0.006	**	OF1 (before SAL)	OF1 (before CNO)	1.818	-0.103	1.103	0.095	0.848	n.s.
							OF2 (after SAL)	OF2 (after CNO)	-1.384	-1.633	0.351	0.188	-0.657	n.s.
	Sham	day 1	Treatment	F(1,32)=5.663	0.023	*
			Treatment:Moment	F(1,32)=0.078	0.782	n.s.	OF1 (before SAL)	OF1 (before CNO)	-0.656	-1.911	1.008	0.521	-0.309	n.s.
							OF2 (after SAL)	OF2 (after CNO)	-0.543	-1.757	1.043	0.595	-0.256	n.s.
		day 4	Treatment	F(1,32)=3.874	0.058	n.s.
			Treatment:Moment	F(1,32)=0.153	0.698	n.s.
		day 7	Treatment	F(1,32)=0.761	0.39	n.s.
			Treatment:Moment	F(1,32)=1.4	0.245	n.s.
