# Supplementary material for: Multiple functions of cerebello-thalamic neurons in learning and offline consolidation of a motor skill in mice
Source: eLife. 2026 Apr 22;13:RP102813. doi: 10.7554/eLife.102813 (PMC13102391; doi:10.7554/eLife.102813)
Supplement: Supplementary file 8. [file elife-102813-supp8.xlsx]

## Sheet: Sheet1
Comparison	group1	group2	n1	n2	test	statistic	raw p	p.adj	effect size
Learning residuals	pooled full DCN controls	Sham+CNO after task	244	32	Wilcoxon	4573	0.115	0.46	0.0948539
		Sham+CNO during task	244	44		5294	0.885	1	0.00857548
		DREADD+SAL after task	244	40		4629	0.603	1	0.0309358
		DREADD+SAL during task	244	48		4820	0.053	0.317	0.113374
		Sham+SAL after task	244	32		3661	0.568	1	0.0344536
		Sham+SAL during task	244	48		6791	0.08	0.402	0.102321
Consolidation residuals		Sham+CNO after task	244	32		3173	0.085	0.426	0.103645
		Sham+CNO during task	244	44		5109	0.611	1	0.0300142
		DREADD+SAL after task	244	40		5180	0.534	1	0.036975
		DREADD+SAL during task	244	48		6943	0.042	0.253	0.118955
		Sham+SAL after task	244	32		3685	0.607	1	0.0310508
		Sham+SAL during task	244	48		5678	0.74	1	0.0194793
