# Supplementary material for: Multiple functions of cerebello-thalamic neurons in learning and offline consolidation of a motor skill in mice
Source: eLife. 2026 Apr 22;13:RP102813. doi: 10.7554/eLife.102813 (PMC13102391; doi:10.7554/eLife.102813)
Supplement: Supplementary file 9. — Deming regression. [file elife-102813-supp9.xlsx]

## Sheet: Sheet1
Comparison	Group	Intcp Ctrl	Slope Ctrl	Median dist.	n Ctrl	Median dist.	n Group	Est. diff.	CI 2.5%	CI 97.5%	Statistics	p-value	Sig.	Eff. Size
				Ctrl-Deming		Grp-Deming					Wilcoxon
Learning vs Initial perf.	DREADD+CNO during task	109.425	-0.800618	-1.77	244	-20.6	56	-14.8381	-23.2219	-6.35258	4821	0.000594	***	0.198322
Consolidated vs Daily learning	DREADD+CNO during task	-9.86037	1.03648	-1.33	244	-13.0	56	-12.0563	-19.8916	-4.76373	4973	0.0015	**	0.183332
Learning vs Initial perf.	DREADD+CNO after task	109.425	-0.800618	-1.77	244	-15.2	32	-9.99719	-20.0466	0.247217	3093	0.0562	n.s.	0.114987
Consolidated vs Daily learning	DREADD+CNO after task	-9.86037	1.03648	-1.33	244	-17.4	32	-14.9236	-24.0529	-6.21102	2512	0.00105	**	0.197363
