# Supplementary material for: Multiple functions of cerebello-thalamic neurons in learning and offline consolidation of a motor skill in mice
Source: eLife. 2026 Apr 22;13:RP102813. doi: 10.7554/eLife.102813 (PMC13102391; doi:10.7554/eLife.102813)
Supplement: Supplementary file 10. [file elife-102813-supp10.xlsx]

## Sheet: Sheet1
Group	Time of treatment	Day	ANOVA Treatnent	p-value	Sig.	ANOVA Treatnent:Trial	p-value	Sig.
CN – CL DREADD	During task	1	F(1,18)=1.61	0.221	n.s.	F(6,108)=0.5894	0.7382	n.s.
		2	F(1,18)=7.548	0.013	*	F(6,108)=0.4718	0.828	n.s.
		3	F(1,18)=5.057	0.037	*	F(6,108)=1.023	0.414	n.s.
		4	F(1,18)=10.28	0.004	**	F(6,108)=0.2491	0.9587	n.s.
		5	F(1,18)=8.577	0.008	**	F(6,108)=0.9642	0.453	n.s.
		6	F(1,18)=15.97	<0.001	***	F(6,108)=0.5614	0.7602	n.s.
		7	F(1,18)=8.386	0.009	**	F(6,108)=0.5056	0.8029	n.s.
	After task	1	F(1,17)=0.3552	0.559	n.s.	F(6,102)=2.68	0.0186	#
		2	F(1,17)=0.5855	0.454	n.s.	F(6,102)=1.179	0.3235	n.s.
		3	F(1,17)=4.418	0.051	n.s.	F(6,102)=3.069	0.0084	##
		4	F(1,17)=1.494	0.238	n.s.	F(6,102)=0.773	0.5929	n.s.
		5	F(1,17)=1.3	0.27	n.s.	F(6,102)=4.524	<0.001	###
		6	F(1,17)=0.01609	0.901	n.s.	F(6,102)=0.3709	0.8959	n.s.
		7	F(1,17)=1.585	0.225	n.s.	F(6,102)=1.124	0.3539	n.s.
CN – VAL DREADD	During task	1	F(1,19)=1.914	0.1826	n.s.	F(6,114)=0.9818	0.441	n.s.
		2	F(1,19)=2.368	0.1403	n.s.	F(6,114)=1.507	0.1819	n.s.
		3	F(1,19)=0.3523	0.5598	n.s.	F(6,114)=0.7044	0.6467	n.s.
		4	F(1,19)=4.968	0.03809	*	F(6,114)=0.7656	0.5985	n.s.
		5	F(1,19)=5.973	0.0245	*	F(6,114)=0.5808	0.745	n.s.
		6	F(1,19)=17.28	0.000536	***	F(6,114)=1.797	0.1058	n.s.
		7	F(1,19)=9.661	0.006	**	F(6,114)=1.223	0.2996	n.s.
	After task	1	F(1,16)=3.824	0.06821	n.s.	F(6,96)=1.381	0.23	n.s.
		2	F(1,16)=2.827	0.1121	n.s.	F(6,96)=2.635	0.02078	#
		3	F(1,16)=0.03395	0.8561	n.s.	F(6,96)=2.015	0.07095	n.s.
		4	F(1,16)=0.06177	0.8069	n.s.	F(6,96)=3.911	0.001543	##
		5	F(1,16)=0.006183	0.938	n.s.	F(6,96)=2.844	0.01361	#
		6	F(1,16)=0.1843	0.6734	n.s.	F(6,96)=4.661	<0.001	###
		7	F(1,16)=2.812	0.113	n.s.	F(6,96)=1.507	0.1839	n.s.
