# Supplementary material for: Multiple functions of cerebello-thalamic neurons in learning and offline consolidation of a motor skill in mice
Source: eLife. 2026 Apr 22;13:RP102813. doi: 10.7554/eLife.102813 (PMC13102391; doi:10.7554/eLife.102813)
Supplement: Supplementary file 11. [file elife-102813-supp11.xlsx]

## Sheet: Sheet1
Comparison	group1	group2	n1	n2	test	statistic	raw p	p adjusted	effsize
residuals Learning vs Initial perf.	pooled pathway-specific controls	CAV-CL DREADD+SAL during task	168	44	Wilcoxon	3686	0.979	1	0.00189609
		CAV-CL DREADD+SAL during task	168	40		3012	0.31	0.93	0.070532
		CAV-VAL DREADD+SAL after task	168	40		3280	0.816	1	0.0162143
		CAV-VAL DREADD+SAL after task	168	44		4134	0.227	0.908	0.0830485
residuals Consolidated vs Daily learning		CAV-CL DREADD+SAL after task	168	44		4337	0.077	0.222	0.121539
		CAV-CL DREADD+SAL during task	168	40		3972	0.074	0.222	0.124039
		CAV-VAL DREADD+SAL after task	168	40		3021	0.322	0.322	0.0687079
		CAV-VAL DREADD+SAL during task	168	44		2782	0.012	0.047	0.173302
