# Supplementary material for: Multiple functions of cerebello-thalamic neurons in learning and offline consolidation of a motor skill in mice
Source: eLife. 2026 Apr 22;13:RP102813. doi: 10.7554/eLife.102813 (PMC13102391; doi:10.7554/eLife.102813)
Supplement: Supplementary file 12. — Deming regression. [file elife-102813-supp12.xlsx]

## Sheet: Sheet1
Comparison	Group	Intcp Ctrl	Slp Ctrl	Median dist.	n Ctrl	Median dist.	n group	Est. diff.	CI 2.5%	CI 97.5%	Statistics	p-value	Sig.	Eff. Size
				Ctrl-Deming		Grp-Deming					Wilcoxon
Learning	CN-CL CNO during task	109.784	-0.70396	-3.60	168	-23.2	40	-21.5589	-31.7388	-12.3491	1857	1.12e-05	***	0.304621
Consolidation	CN-CL CNO during task	-14.2949	1.1923	1.47	168	-2.59	40	0.035502	-9.81223	9.99394	3362	0.997	n.s.	0.000405351
Learning	CN-CL CNO after task	109.784	-0.70396	-3.60	168	-8.14	32	-5.60847	-18.394	7.99359	2425	0.382	n.s.	0.0619732
Consolidation	CN-CL CNO after task	-14.2949	1.1923	1.47	168	3.255	32	1.76523	-11.1417	14.0227	2755	0.825	n.s.	0.0157878
Learning	CN-VAL CNO during task	109.784	-0.70396	-3.60	168	-4.28	40	-0.967055	-10.9224	9.26252	3292	0.844	n.s.	0.0137819
Consolidation	CN-VAL CNO during task	-14.2949	1.1923	1.47	168	-11.2	40	-14.9492	-23.7433	-6.32372	2225	0.000913	***	0.230037
Learning	CN-VAL CNO after task	109.784	-0.70396	-3.60	168	-1.53	32	1.2677	-12.2071	14.4473	2749	0.84	n.s.	0.014374
Consolidation	CN-VAL CNO after task	-14.2949	1.1923	1.47	168	-11.2	32	-17.7101	-29.3643	-7.16411	1742	0.00163	**	0.222915
