# Supplementary material for: Multiple functions of cerebello-thalamic neurons in learning and offline consolidation of a motor skill in mice
Source: eLife. 2026 Apr 22;13:RP102813. doi: 10.7554/eLife.102813 (PMC13102391; doi:10.7554/eLife.102813)
Supplement: Supplementary file 13. [file elife-102813-supp13.xlsx]

## Sheet: Sheet1
Experiment	Value	ANOVA Group	p-value	Sig.
Footprint	Linear movement	F(3,31)=0.887	0.459	n.s.
	Sigma	F(3,31)=0.103	0.958	n.s.
	Alternate coefficient	F(3,31)=0.476	0.701	n.s.
Horizontal Bar	Latency	F(3,33)=0.826	0.489	n.s.
Vertical Pole	Latency	F(3,33)=0.968	0.42	n.s.
Grid test	Latency	F(3,33)=0.305	0.822	n.s.
