# Supplementary material for: Multiple functions of cerebello-thalamic neurons in learning and offline consolidation of a motor skill in mice
Source: eLife. 2026 Apr 22;13:RP102813. doi: 10.7554/eLife.102813 (PMC13102391; doi:10.7554/eLife.102813)
Supplement: Supplementary file 14. [file elife-102813-supp14.xlsx]

## Sheet: Sheet1
Group	Day	Factor	ANOVA	p-value	Sig.	Group 1	Group 2	Statistic	CI 2.5%	CI 97.5%	p-value	Cohen’s D	Sig.
CN-CL	1	Treatment	F(1,44)=1.443	0.236	n.s.
		Treatment:Moment	F(1,44)=2.457	0.124	n.s.			posthoc
	4	Treatment	F(1,44)=15.56	<0.001	***			t-test
		Treatment:Moment	F(1,44)=16.594	<0.001	***	OF1 (before SAL)	OF1 (before CNO)	2.729	0.416	3.076	0.013	1.1	*
						OF2 (after SAL)	OF2 (after CNO)	-0.053	-1.136	1.08	0.958	-0.023	n.s.
	7	Treatment	F(1,44)=2.483	0.122	n.s.
		Treatment:Moment	F(1,44)=2.31	0.136	n.s.
CN-VAL	1	Treatment	F(1,36)=16.74	<0.001	***
		Treatment:Moment	F(1,36)=4.745	0.036	*	OF1 (before SAL)	OF1 (before CNO)	-2.607	-3.609	-0.363	0.02	-1.166	*
						OF2 (after SAL)	OF2 (after CNO)	-0.976	-1.952	0.74	0.348	-0.436	n.s.
	4	Treatment	F(1,36)=0.197	0.66	n.s.
		Treatment:Moment	F(1,36)=10.455	0.003	**	OF1 (before SAL)	OF1 (before CNO)	-1.785	-1.306	0.112	0.093	-0.798	n.s.
						OF2 (after SAL)	OF2 (after CNO)	0.889	-0.62	1.526	0.386	0.397	n.s.
	7	Treatment	F(1,36)=20.015	<0.001	***
		Treatment:Moment	F(1,36)=0.61	0.44	n.s.	OF1 (before SAL)	OF1 (before CNO)	-1.794	-1.79	0.142	0.09	-0.802	n.s.
						OF2 (after SAL)	OF2 (after CNO)	-1.584	-1.358	0.2	0.134	-0.708	n.s.
