# Supplementary material for: Multiple functions of cerebello-thalamic neurons in learning and offline consolidation of a motor skill in mice
Source: eLife. 2026 Apr 22;13:RP102813. doi: 10.7554/eLife.102813 (PMC13102391; doi:10.7554/eLife.102813)
Supplement: Supplementary file 15. [file elife-102813-supp15.xlsx]

## Sheet: Sheet1
Group	Factor	ANOVA	p-value	Sig.	Group 1	Group 2	Statistic	CI 2.5%	CI 97.5%	p-value	Cohen’s D	Sig.
CN-CL	Treatment	F(1,106)=0.416	0.52	n.s.
	Speed	F(1,106)=116.649	<0.001	***
	Treatment:Speed	F(1,106)=0.007	0.934	n.s.
CN-VAL	Treatment	F(1,96)=17.495	<0.001	***
	Speed	F(1,96)=132.095	<0.001	***
	Treatment:Speed	F(1,96)=1.024	0.314	n.s.	5 rpm-SAL	5 rpm-CNO	0.876	-23.271	53.271	0.402	0.392	n.s.
					10 rpm-SAL	10 rpm-CNO	1.21	-17.121	56.521	0.257	0.541	n.s.
					15 rpm-SAL	15 rpm-CNO	3.807	22.593	82.807	0.002	1.703	**
					20 pm-SAL	20 rpm-CNO	2.373	5.589	94.811	0.03	1.061	*
					25 rpm-SAL	25 rpm-CNO	2.044	-2.577	58.777	0.069	0.914	n.s.
