# Supplementary material for: Multiple functions of cerebello-thalamic neurons in learning and offline consolidation of a motor skill in mice
Source: eLife. 2026 Apr 22;13:RP102813. doi: 10.7554/eLife.102813 (PMC13102391; doi:10.7554/eLife.102813)
Supplement: Supplementary file 16. [file elife-102813-supp16.xlsx]

## Sheet: Sheet1
Group	Time of treatment	Day	ANOVA Treatment	p-value	Sig.	ANOVA Treatment:Trial	p-value	Sig.
CN-CL	During task	7	F(1,18)=8.386	0.009632	**	F(6,108)=0.5056	0.8029	n.s.
		8	F(1,18)=6.786	0.017	*	F(6,108)=0.3734	0.894	n.s.
		9	F(1,18)=3.659	0.071	n.s.	F(6,108)=0.5489	0.769	n.s.
CN-VAL	During task	7	F(1,19)=9.661	0.005789	**	F(6,114)=1.223	0.2996	n.s.
		8	F(1,19)=3.106	0.094	n.s.	F(6,114)=0.5508	0.768	n.s.
		9	F(1,19)=4.405	0.049	*	F(6,114)=1.807	0.103	n.s.
