# Supplementary material for: Multiple functions of cerebello-thalamic neurons in learning and offline consolidation of a motor skill in mice
Source: eLife. 2026 Apr 22;13:RP102813. doi: 10.7554/eLife.102813 (PMC13102391; doi:10.7554/eLife.102813)
Supplement: Supplementary file 17. [file elife-102813-supp17.xlsx]

## Sheet: Sheet1
Time of treatment	Group	Measure	n	Comparison	Estimate	Test	Alternative	Statistic	p-value	Sig.	95% CI high	95% CI	Effect size
During task	CN-CL SAL-CNO	daily start	10	day 7 vs <day8 day9>	-76.2054	Wilcoxon	two.sided	8	0.0488	*	-118.634	-23.4911	0.628542
		daily end	10		-72.2321			5	0.0195	*	-123.991	-14.0893	0.725241
	CN-CL CNO-SAL	daily start	10		49.0446			55	0.00195	**	18.875	73.9464	0.886405
		daily end	10		39.125			45	0.084	n.s.	-1.58929	83.5	0.564076
	CN-VAL SAL-CNO	daily start	11		-65.567			0	0.000977	***	-106.054	-26.25	0.884652
		daily end	11		-73.317			10	0.042	*	-127.598	-1.48214	0.616575
	CN-VAL CNO-SAL	daily start	10		19.5536			39	0.275	n.s.	-12.8571	40.4286	0.370679
		daily end	10		14.9286			39	0.275	n.s.	-14.9821	49.0179	0.370679
